# Supplementary material
Source: PubMed Central journal article supplement (PMC2757814)
Supplement: 0909022106_0909022106SI.pdf [file 0909022106_0909022106SI.pdf]

# Supporting Information

Wang et al. 10.1073/pnas.0909022106

Table S1. PSF-binding DNAs screened by ChIP-chip assays

| Name          | Description                                                                                                                                                                               | Accession no. |
|---------------|-------------------------------------------------------------------------------------------------------------------------------------------------------------------------------------------|---------------|
| Cart          | Cocaine- and amphetamine-regulated transcript                                                                                                                                             | NM.013732     |
| Mid1          | Midline 1                                                                                                                                                                                 | BC059027      |
| Pik3c3        | Phosphoinositide-3-kinase, class 3                                                                                                                                                        | NM.181414     |
| Sra1          | Steroid receptor RNA activator 1                                                                                                                                                          | NM.025291     |
| Pias2         | Protein inhibitor of activated STAT 2                                                                                                                                                     | AF039567      |
| Efcab5        | EF-hand calcium binding domain 5                                                                                                                                                          | AK035698      |
| Pld3          | Phospholipase D family, member 3                                                                                                                                                          | NM.011116     |
| Tfam          | Transcription factor A, mitochondrial                                                                                                                                                     | NM.009360     |
| Sema6a        | Sema domain, transmembrane domain, and cytoplasmic domain, (semaphorin) 6A                                                                                                                | BC062979      |
| Bex2          | Brain-expressed X-linked 2                                                                                                                                                                | NM.009749     |
| Srms          | Src-related kinase lacking C-terminal regulatory tyrosine and N-terminal myristoylation sites                                                                                             | NM.011481     |
| lfnz          | IFN- $\zeta$                                                                                                                                                                              | NM.197889     |
| Tmed6         | Transmembrane emp24 protein transport domain containing 6                                                                                                                                 | NM.025458     |
| Gpr111        | G protein-coupled receptor 111                                                                                                                                                            | NM.001033493  |
| Wfdc8         | WAP 4-disulfide core domain 8                                                                                                                                                             | XM.902928     |
| Nsfl1c        | NSFL1 (p97) cofactor (p47)                                                                                                                                                                | NM.198326     |
| Kars          | Lysyl-tRNA synthetase                                                                                                                                                                     | NM.053092     |
| Sfi1          | Sfi1 homolog, spindle assembly associated (yeast)                                                                                                                                         | AK133558      |
| Osta          | Organic solute transporter- $\alpha$                                                                                                                                                      | NM.145932     |
| Tiam1         | T-cell lymphoma invasion and metastasis 1                                                                                                                                                 | NM.009384     |
| Aanat         | Arylalkylamine N-acetyltransferase                                                                                                                                                        | NM.009591     |
| Zfp667        | Zinc finger protein 667                                                                                                                                                                   | NM.001024928  |
| Svep1         | Sushi, von Willebrand factor type A, EGF and pentraxin domain containing 1                                                                                                                | NM.022814     |
| Tnfrsf8       | TNF receptor superfamily, member 8                                                                                                                                                        | NM.009401     |
| Cdh13         | Cadherin 13                                                                                                                                                                               | NM.019707     |
| C1r           | Complement component 1, r subcomponent                                                                                                                                                    | NM.023143     |
| Rab23         | RAB23, member RAS oncogene family                                                                                                                                                         | NM.008999     |
| LOC545649     | similar to IFN- $\zeta$                                                                                                                                                                   | XM.620070     |
| LOC622846     | Similar to zinc finger protein 1 homolog (Zfp-1)                                                                                                                                          | XM.899253     |
| LOC627828     | Similar to heterogeneous nuclear ribonucleoprotein A3                                                                                                                                     | XM.001004661  |
| LOC385154     | Similar to development- and differentiation-enhancing factor 2% 3B PYK2 C-terminus-associated protein                                                                                     | AK041326      |
| LOC545248     | Hypothetical LOC545248                                                                                                                                                                    |               |
| 4833412L08Rik | RIKEN cDNA 4833412L08 gene                                                                                                                                                                |               |
| LOC544988     | Hypothetical protein LOC544988                                                                                                                                                            |               |
| LOC623078     | Hypothetical LOC623078                                                                                                                                                                    |               |
| B930046C15Rik | RIKEN cDNA B930046C15 gene                                                                                                                                                                |               |
| 1700024P12Rik | RIKEN cDNA 1700024P12 gene                                                                                                                                                                |               |
| 1700030C10Rik | RIKEN cDNA 1700030C10 gene                                                                                                                                                                |               |
| C630041L24Rik | RIKEN cDNA C630041L24 gene                                                                                                                                                                |               |
| 2610005L07Rik | RIKEN cDNA 2610005L07 gene                                                                                                                                                                |               |
| A430108E01Rik | RIKEN cDNA A430108E01 gene                                                                                                                                                                |               |
| 2310022A10Rik | RIKEN cDNA 2310022A10 gene                                                                                                                                                                |               |
| A430108E01Rik | RIKEN cDNA A430108E01 gene                                                                                                                                                                |               |
| BC051628      | cDNA sequence BC051628                                                                                                                                                                    |               |
| 5730460C07Rik | RIKEN cDNA 5730460C07 gene                                                                                                                                                                |               |
| LOC433801     | Similar to RIKEN cDNA 6330416L07 gene                                                                                                                                                     |               |
| A430108E01Rik | RIKEN cDNA A430108E01 gene                                                                                                                                                                |               |
| AA407659      | Expressed sequence AA407659                                                                                                                                                               |               |
| BC015286      | cDNA sequence BC015286                                                                                                                                                                    |               |
| N/A           | Mus musculus 16-day embryo head cDNA, RIKEN full-length enriched library, clone:C130032N12 product:hypothetical sterile $\alpha$ -motif homology containing protein, full-insert sequence |               |
| N/A           | Mus musculus adult male aorta and vein cDNA, RIKEN full-length enriched library, clone:A530061H09 product:hypothetical protein, full-insert sequence                                      |               |
| N/A           | Mus musculus cDNA clone IMAGE:4500967, with apparent retained intron                                                                                                                      |               |
| N/A           | Mus musculus cDNA clone MGC:78219 IMAGE:3489785, complete cds                                                                                                                             |               |
| N/A           | Mus musculus lung RCB-0558 LLC cDNA, RIKEN full-length enriched library, clone:G730042M17 product:NADH dehydrogenase 4, mitochondrial, full-insert sequence                               |               |
| N/A           | Mus musculus cDNA clone MGC:117970 IMAGE:3675856, complete cds                                                                                                                            |               |
| N/A           | Mus musculus cDNA clone MGC:129518 IMAGE:40050568, complete cds                                                                                                                           |               |
| N/A           | Mus musculus adult male testis cDNA, RIKEN full-length enriched library, clone:4930599F03 product:hypothetical protein, full-insert sequence                                              |               |

cds, coding sequence; EF, evolutionary family; N/A, not available.
